# Supplementary material for: Synthesis of porous microplatelets of α form anhydrous guanine in DMSO/water mixed solvents
Source: Royal Society of Chemistry journal article supplement (doi:10.1039/d1ce01709h), 2022-01-01
Supplement: d1ce01709h1.pdf [file d1ce01709h1.pdf]

**Electronic Supplementary Information for**

# Synthesis of Porous Microplatelets of $\alpha$ Form Anhydrous Guanine in DMSO/Water Mixed Solvents

Fenghua Chen,<sup>a,b,c</sup> Yurong Ma,<sup>a\*</sup> and Limin Qi<sup>b</sup>

<sup>a</sup>School of Chemistry and Chemical Engineering, Beijing Institute of Technology, 5 South Zhongguancun Street, Haidian District, Beijing 100081, China

<sup>b</sup>Beijing National Laboratory for Molecular Sciences, College of Chemistry, Peking University, No.5 Yiheyuan Road, Haidian District, Beijing 100871, China

<sup>c</sup>School of Resources and Chemical Engineering, Sanming University, No. 25 Jingdong Road, Sanming 365004, Fujian, China

---

*Corresponding Author*

*\*(Y. M.) E-mail: yurong.ma@bit.edu.cn*

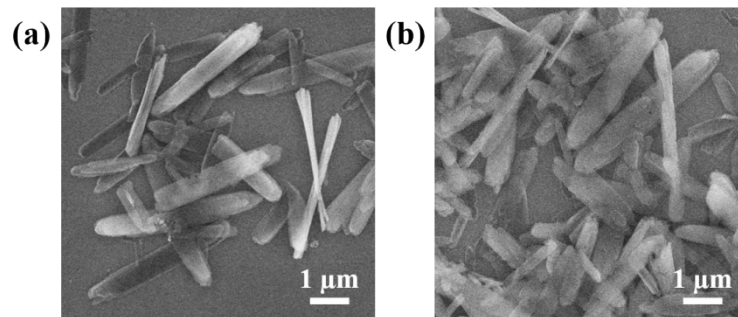

**Figure S1.** The effects of molecular weight of PVP on guanine microplatelets. SEM images of microplatelets with PVP of different molecular weight. (a) Mw ~ 240,000, 1.7 mg·ml<sup>-1</sup>, (b) Mw ~ 360,000, 8 mg·ml<sup>-1</sup>. The reaction time was overnight.

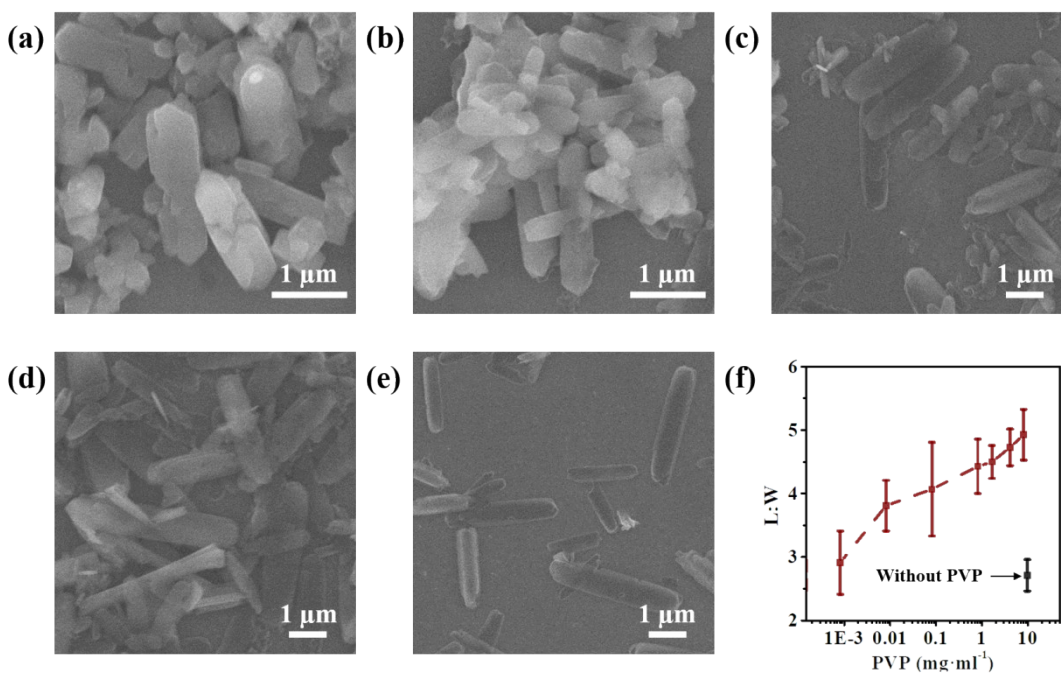

**Figure S2.** The effects of PVP K30 concentrations on guanine samples. SEM images of guanine samples with (a) 0.0008, (b) 0.008, (c) 0.08, (d) 0.8, (e) 8 mg · ml<sup>-1</sup> PVP K30, (f) the ratios of length and width with different PVP K30 concentrations measured from SEM images. The reaction time was overnight.
